# Supplementary material for: Paracrine signals influence patterns of fibrocartilage differentiation in a lyophilized gelatin hydrogel for applications in rotator cuff repair
Source: Royal Society of Chemistry journal article supplement (doi:10.1039/d4bm00543k), 2024-01-01
Supplement: d4bm00543k1.pdf [file d4bm00543k1.pdf]

Supplementary Materials for

**Paracrine signals influence patterns of fibrocartilage differentiation in a lyophilized gelatin hydrogel for applications in rotator cuff repair**

**Kyle B. Timmer<sup>1</sup>, Megan L. Killian<sup>4,5</sup>, Brendan A.C. Harley<sup>1,2,3</sup>**

<sup>1</sup> Dept. Chemical and Biomolecular Engineering

<sup>2</sup> Cancer Center at Illinois

<sup>3</sup> Carl R. Woese Institute for Genomic Biology

University of Illinois Urbana-Champaign

Urbana, IL 61801

<sup>4</sup> Department of Orthopaedic Surgery

<sup>5</sup> Department of Molecular and Integrative Physiology

University of Michigan Ann Arbor

Ann Arbor, Michigan 48109

**Corresponding Author:**

B.A.C. Harley

Dept. of Chemical and Biomolecular Engineering

Cancer Center at Illinois

Carl R. Woese Institute for Genomic Biology

University of Illinois at Urbana-Champaign

110 Roger Adams Laboratory

600 S. Mathews Ave.

Urbana, IL 61801

Phone: (217) 244-7112

Fax: (217) 333-5052

e-mail: [bharley@illinois.edu](mailto:bharley@illinois.edu)

**Supplemental Table T1:** Taqman Gene Primers for PCR

| <b>Gene Name</b> | <b>Taqman Assay ID</b> |
|------------------|------------------------|
| <i>GAPDH</i>     | Hs02786624_g1          |
| <i>COL2A1</i>    | Hs00264051_m1          |
| <i>COL10A1</i>   | Hs00166657_m1          |
| <i>ACAN</i>      | Hs00153936_m1          |
| <i>SCX</i>       | Hs03054634_g1          |
| <i>SOX9</i>      | Hs00165814_m1          |
| <i>RUNX2</i>     | Hs01047973_m1          |

**Supplemental Table T2:** List of NanoString nCounter Panel gene targets and relevance for enthesal study.

| <b>Gene Name</b> | <b>HUGO Gene</b> | <b>Probe NSID</b>   | <b>Category</b>                          | <b>Ref.</b>               |
|------------------|------------------|---------------------|------------------------------------------|---------------------------|
| <i>RUNX2</i>     | <i>RUNX2</i>     | NM_004348.3:1850    | Bone, Enthesis Transcription Factor      | [1-4]                     |
| <i>OSX</i>       | <i>SP7</i>       | NM_001173467.1:1510 | Bone Transcription Factor                | [5]                       |
| <i>OPN</i>       | <i>SPP1</i>      | NM_000582.2:760     | Bone Transcription Factor                | [6, 7]                    |
| <i>BSP</i>       | <i>IBSP</i>      | NM_004967.3:876     | Bone, Enthesis Transcription Factor      | [7, 8]                    |
| <i>ALP</i>       | <i>SLPI</i>      | NM_003064.2:330     | Bone Transcription Factor                | [3, 9]                    |
| <i>SCX</i>       | <i>SCX</i>       | NM_001080514.2:550  | Tendon, Enthesis Transcription Factor    | [4, 10-13]                |
| <i>TNC</i>       | <i>TNC</i>       | NM_002160.3:1215    | Tendon Transcription Factor              | [4, 14]                   |
| <i>TNMD</i>      | <i>TNMD</i>      | NM_022144.2:462     | Tendon Transcription Factor              | [2, 15]                   |
| <i>IGFBP5</i>    | <i>IGFBP5</i>    | NM_000599.3:3320    | Tendon Transcription Factor              | [4, 16]                   |
| <i>COMP</i>      | <i>COMP</i>      | NM_000095.2:1744    | Tendon Transcription Factor              | [1, 17]                   |
| <i>EGR1</i>      | <i>EGR1</i>      | NM_001964.2:1505    | Tendon, Enthesis Transcription Factor    | [14]                      |
| <i>MKX</i>       | <i>MKX</i>       | NM_173576.2:545     | Tendon Transcription Factor              | [18]                      |
| <i>SOX9</i>      | <i>SOX9</i>      | NM_000346.2:2135    | Cartilage, Enthesis Transcription Factor | [2, 4, 10, 12, 18, 19]    |
| <i>Gli1</i>      | <i>GLI1</i>      | NM_005269.1:2885    | Enthesis Transcription Factor            | [4, 11, 15]               |
| <i>KLF2</i>      | <i>KLF2</i>      | NM_016270.2:1015    | Enthesis Transcription Factor            | [4]                       |
| <i>KLF4</i>      | <i>KLF4</i>      | NM_004235.4:1980    | Enthesis Transcription Factor            | [4]                       |
| <i>Col1A1</i>    | <i>COL1A1</i>    | NM_000088.3:5210    | Tendon-to-Bone Matrix Marker             | [3, 4, 19-22]             |
| <i>COL2A1</i>    | <i>COL1A2</i>    | NM_001844.4:4745    | Tendon-to-Bone Matrix Marker             | [1, 2, 20, 23] [3, 4, 19] |
| <i>COI3A1</i>    | <i>COL3A1</i>    | NM_000090.3:180     | Tendon-to-Bone Matrix Marker             | [22]                      |
| <i>COL5A1</i>    | <i>COL5A1</i>    | NM_000093.3:872     | Tendon-to-Bone Matrix Marker             | [4]                       |
| <i>COL6A1</i>    | <i>COL6A1</i>    | NM_001848.2:3665    | Tendon-to-Bone Matrix Marker             | [22]                      |
| <i>Col9A1</i>    | <i>COL9A1</i>    | NM_001851.4:3198    | Tendon-to-Bone Matrix Marker             | [2]                       |
| <i>Col10A1</i>   | <i>COL10A1</i>   | NM_000493.3:135     | Tendon-to-Bone Matrix Marker             | [3, 4, 19, 21, 24]        |
| <i>Col11A1</i>   | <i>COL11A1</i>   | NM_001190709.1:2490 | Tendon-to-Bone Matrix Marker             | [4]                       |
| <i>ACAN</i>      | <i>ACAN</i>      | NM_013227.3:335     | Tendon-to-Bone Matrix Marker             | [1, 10, 20, 21] [4, 19]   |
| <i>DCN</i>       | <i>DCN</i>       | NM_001920.3:420     | Tendon-to-Bone Matrix Marker             | [25]                      |
| <i>BGN</i>       | <i>BGN</i>       | NM_001711.3:1935    | Tendon-to-Bone Matrix Marker             | [4]                       |

|                     |              |                     |                                  |                            |
|---------------------|--------------|---------------------|----------------------------------|----------------------------|
| <i>PDGF-BB</i>      | <i>PDGFB</i> | NM_033016.2:1480    | Tendon-to-Bone Growth Factor     | [17, 26-28]                |
| <i>TGFβ1</i>        | <i>TGFB1</i> | NM_000660.3:1260    | Tendon-to-Bone Growth Factor     | [4, 10, 13, 24, 29]        |
| <i>TGFβ3</i>        | <i>TGFB3</i> | NM_003239.2:706     | Tendon-to-Bone Growth Factor     | [4, 10, 24, 29]            |
| <i>BMP2</i>         | <i>BMP2</i>  | NM_001200.2:1515    | Tendon-to-Bone Growth Factor     | [4, 10, 12, 18, 22, 30]    |
| <i>BMP4</i>         | <i>BMP4</i>  | NM_001202.3:659     | Tendon-to-Bone Growth Factor     | [4, 10, 18, 30-33]         |
| <i>BMP7</i>         | <i>BMP7</i>  | NM_001719.1:525     | Tendon-to-Bone Growth Factor     | [1, 4, 10, 18, 30, 34, 35] |
| <i>BMP12 (GDF7)</i> | <i>GDF7</i>  | NM_182828.2:954     | Tendon-to-Bone Growth Factor     | [4, 17, 18, 28, 30, 36]    |
| <i>BMP14 (GDF5)</i> | <i>GDF5</i>  | NM_000557.2:155     | Tendon-to-Bone Growth Factor     | [4, 17, 18, 30, 37]        |
| <i>IGF-1</i>        | <i>IGF1</i>  | NM_000618.3:491     | Tendon-to-Bone Growth Factor     | [28, 36, 38-41]            |
| <i>FGF2 (bFGF)</i>  | <i>FGF2</i>  | NM_002006.4:620     | Tendon-to-Bone Growth Factor     | [4, 17, 27]                |
| <i>FGF7</i>         | <i>FGF7</i>  | NM_002009.3:190     | Tendon-to-Bone Growth Factor     | [4, 22]                    |
| <i>IHH</i>          | <i>IHH</i>   | NM_002181.2:1693    | Tendon-to-Bone Growth Factor     | [4, 10, 12, 18]            |
| <i>PTHrP</i>        | <i>PTHLH</i> | NM_198965.1:605     | Tendon-to-Bone Growth Factor     | [4, 12, 13, 23]            |
| <i>EGF</i>          | <i>EGF</i>   | NM_001963.4:1022    | Tendon-to-Bone Growth Factor     | [42]                       |
| <i>VEGF</i>         | <i>VEGFA</i> | NM_001025366.3:1314 | Tendon-to-Bone Growth Factor     | [43]                       |
| <i>SMAD3</i>        | <i>SMAD3</i> | NM_005902.3:4220    | Tendon, Enthesis Relevant Marker | [14]                       |
| <i>MMP13</i>        | <i>MMP13</i> | NM_002427.2:951     | Tendon-to-Bone MMP               | [1, 30, 44]                |
| <i>MMP9</i>         | <i>MMP9</i>  | NM_004994.2:1530    | Tendon-to-Bone MMP               | [44, 45]                   |
| <i>MCAM</i>         | <i>MCAM</i>  | NM_006500.2:2482    | MSC Marker                       | [22]                       |
| <i>MYLK</i>         | <i>MYLK</i>  | NM_053032.2:710     | MSC Marker                       | [22]                       |
| <i>PPARγ</i>        | <i>PPARG</i> | NM_005037.5:345     | Adipocyte Marker                 | [6]                        |
| <i>FABP4</i>        | <i>FABP4</i> | NM_001442.2:415     | Adipocyte Marker                 | [6]                        |
| <i>GAPDH</i>        | <i>GAPDH</i> | NM_001256799.1:386  | Housekeeping Gene                | [46-49]                    |
| <i>ACTB</i>         | <i>ACTB</i>  | NM_001101.2:1010    | Housekeeping Gene                | [48, 50, 51]               |
| <i>IPO8</i>         | <i>IPO8</i>  | NM_006390.2:860     | Housekeeping Gene                | [48, 52, 53]               |
| <i>YWHAZ</i>        | <i>YWHAZ</i> | NM_003406.2:2345    | Housekeeping Gene                | [49, 50]                   |

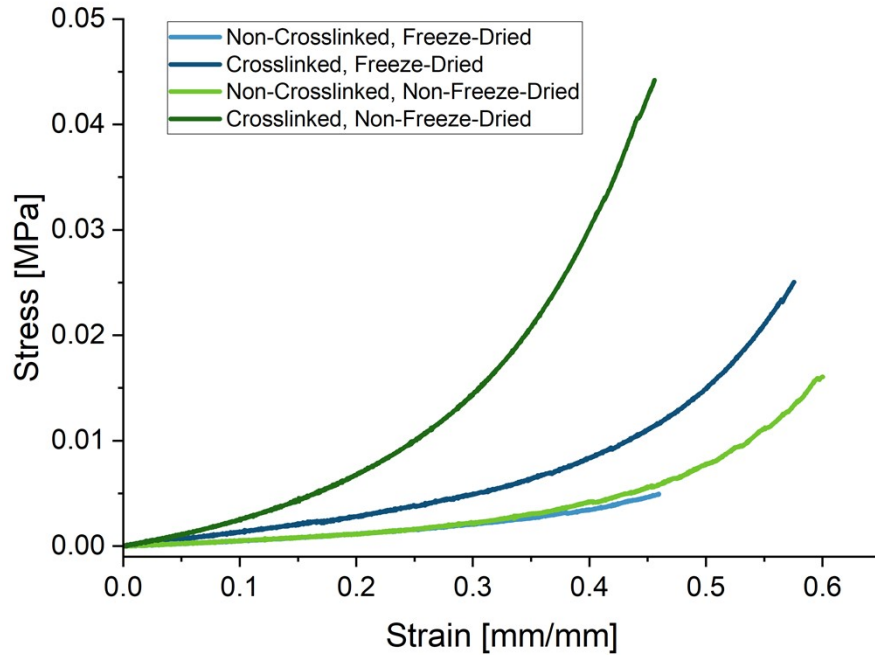

**Supplemental Figure S1: Enthesis hydrogel mechanical properties.** Representative stress-strain diagrams for compression tests of Gel-SH hydrogels as a function of fabrication processing (non-Freeze Dried vs. Freeze Dried) and post-fabrication crosslinking (Non-Crosslinked vs. Crosslinked). Constructs used for cell activity studies are Freeze Dried and Crosslinked.

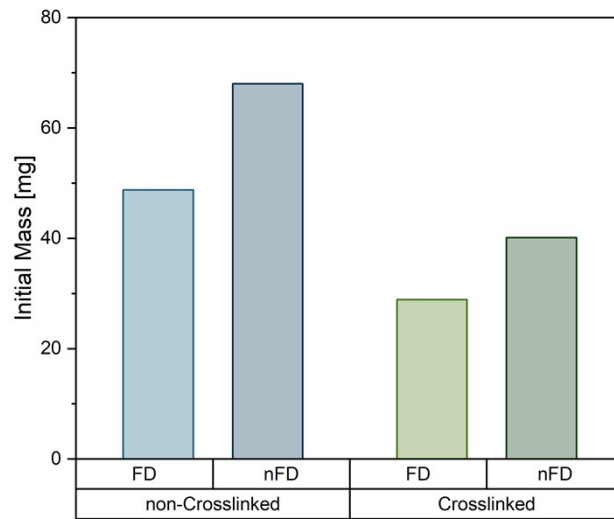

**Supplemental Figure S2: Initial mean mass for Gel-SH hydrogel degradation testing.** Average initial mass (reported as average weight from a single measurement of the aggregate mass of n=10+ individual hydrogel specimens) as a function of fabrication processing (non-Freeze Dried, “nFD” vs. Freeze Dried, “FD”) and post-fabrication crosslinking (Non-Crosslinked vs. Crosslinked). Constructs used for cell activity studies are Freeze Dried and Crosslinked.

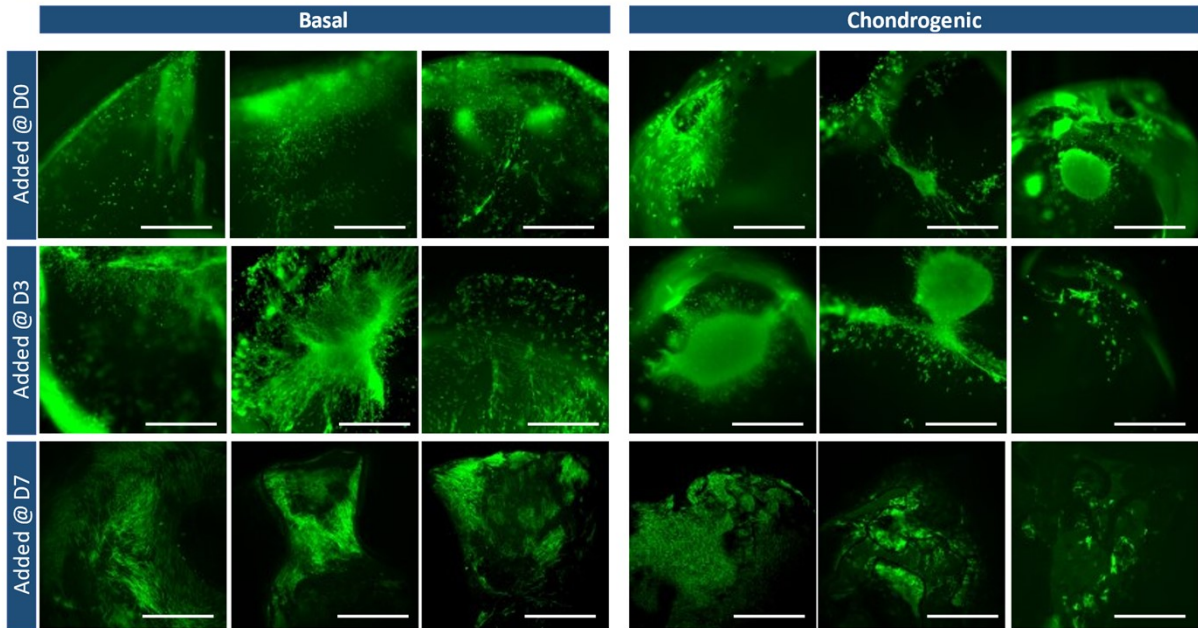

**Supplemental Figure S3: hMSC proliferation and invasion analysis within Gel-SH constructs.** Images display calcein-stained live hMSCs, comparing basal and chondrogenic conditions if chondrogenic media is added at various times. Scale bar: 1mm





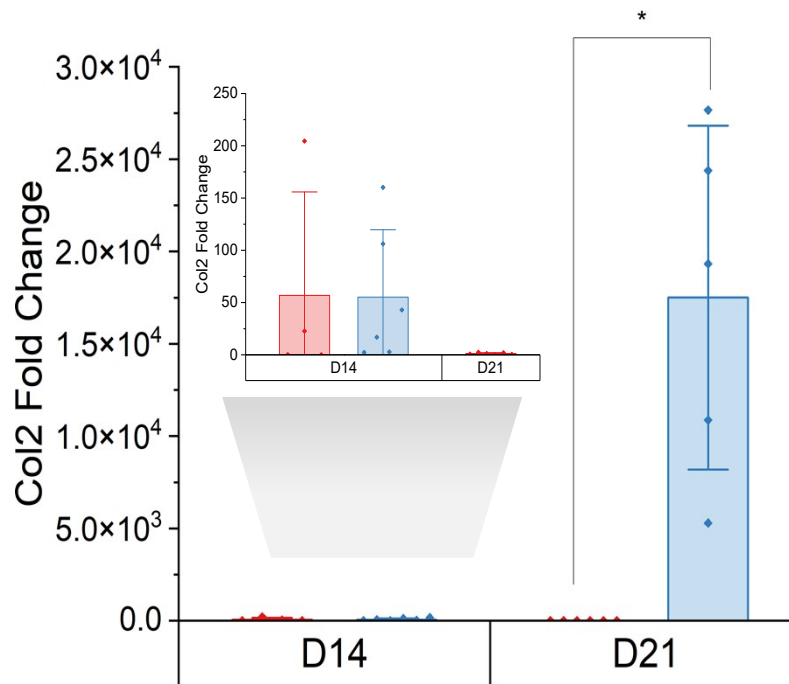

**Supplemental Figure S5: COL2 expression of hMSCs in crosslinked, lyophilized Gel-SH hydrogels.** Expression patterns (n=5) for cartilage matrix protein (COL2) after 7 (Day 14) or 14 (Day 21) days of exposure to chondrogenic (blue) vs basal (red) media

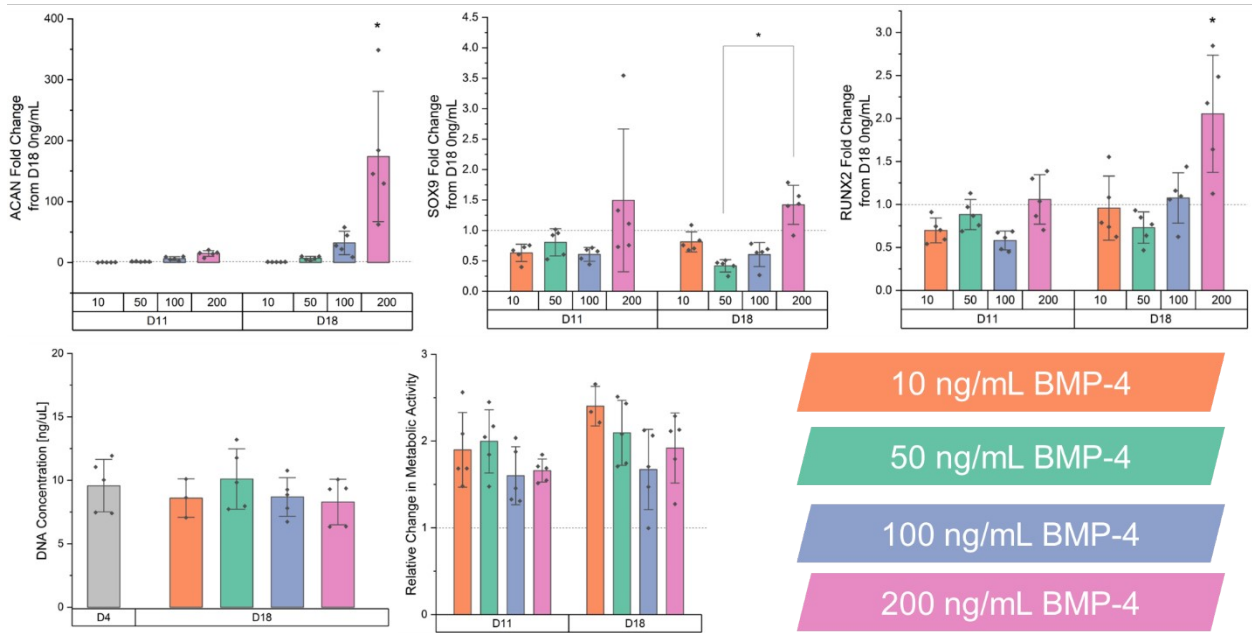

**Supplemental Figure S6: hMSC response to differential dosage of BMP-4.** In a truncated study, hMSCs were exposed to 2 weeks of BMP-4 supplementation after 4 days of culture; all other methods were conducted identically to those for chondrogenic and single biomolecule assessment

**A**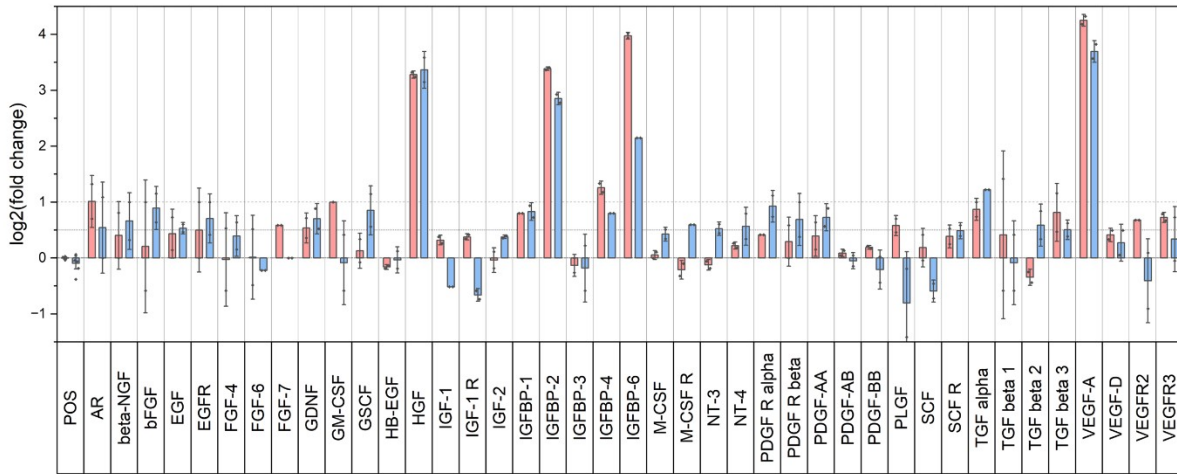**B**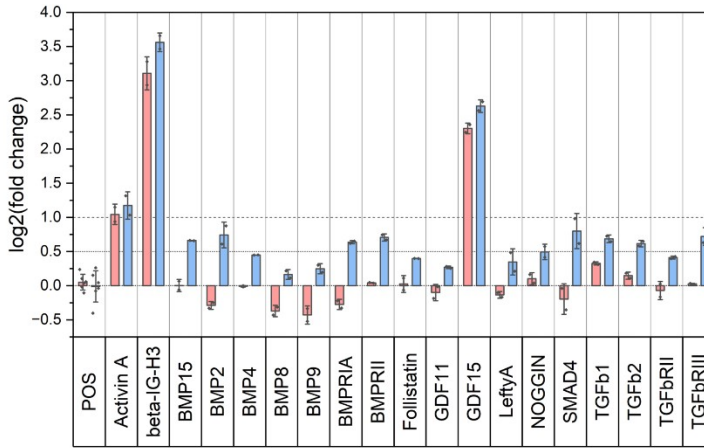**C**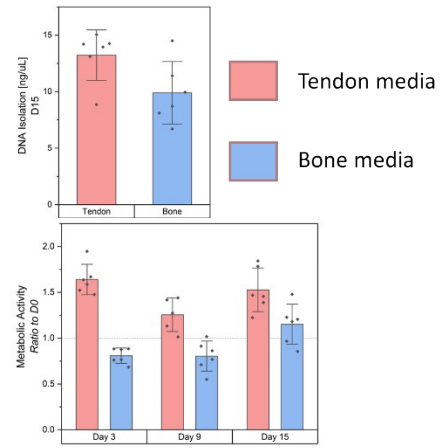

**Supplemental Figure S7. Conditioned media analysis from hMSCs seeded onto tendon- or bone-mimetic collagen scaffolds.** (A-B) Relative cytokine levels (n=2) present in conditioned media relative to a basal media control along with (C) overall metabolic activity (n=6) and DNA concentration (n=6) of hMSCs within their constructs over the isolation period.

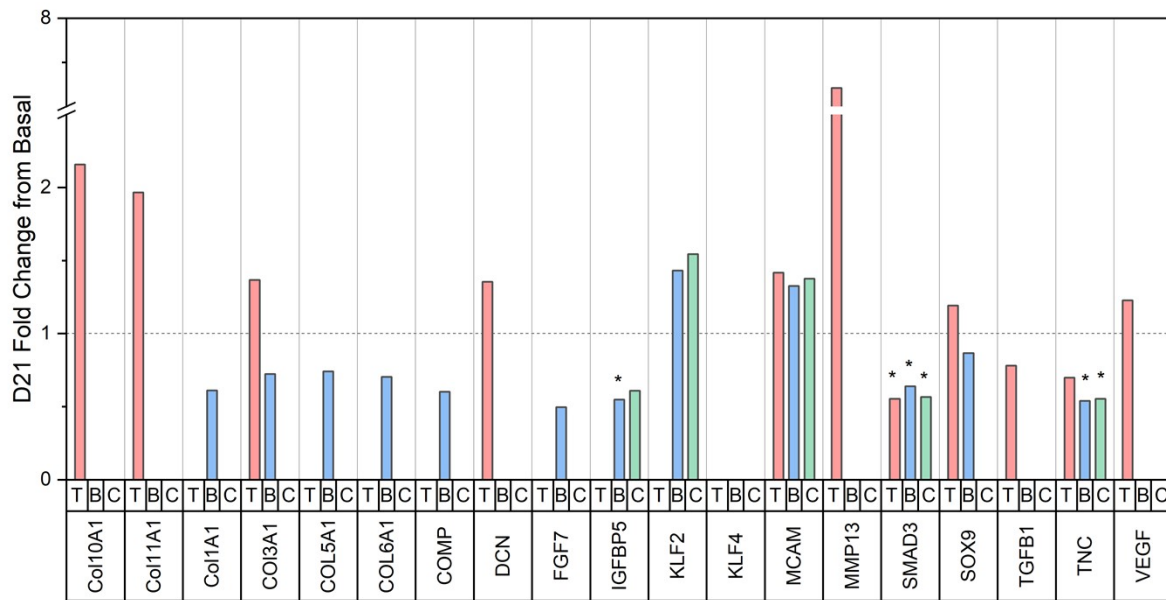

**Supplemental Figure S8: Individual differentiation patterns of hMSCs in crosslinked, lyophilized Gel-SH hydrogels at Day 21 of culture in response to conditioned media, relative to basal D21 control.** Expression patterns (n=3) via nCounter mRNA expression panel. All bars denote trends with a p-value < 0.20. Absence of a bar indicates no trend with p-value < 0.20. An asterisk indicates a significant ( $p < 0.05$ ) change in expression.



1. Calejo, I., et al., *Enthesis Tissue Engineering: Biological Requirements Meet at the Interface*. Tissue Engineering Part B: Reviews, 2019. **25**(4): p. 330-356.
2. Kuntz, L.A., et al., *Biomarkers for tissue engineering of the tendon-bone interface*. PLOS ONE, 2018. **13**(1): p. e0189668.
3. Zhang, X., et al., *Single-cell rna seq analysis identifies the biomarkers and differentiation of chondrocyte in human osteoarthritis*. Am J Transl Res, 2020. **12**(11): p. 7326-7339.
4. Kult, S., et al., *Bi-fated tendon-to-bone attachment cells are regulated by shared enhancers and KLF transcription factors*. eLife, 2021. **10**: p. e55361.
5. Chan, W.C.W., et al., *Regulation and Role of Transcription Factors in Osteogenesis*. Int J Mol Sci, 2021. **22**(11).
6. Le Blanc, S., et al., *Fibroblast growth factors 1 and 2 inhibit adipogenesis of human bone marrow stromal cells in 3D collagen gels*. Exp Cell Res, 2015. **338**(2): p. 136-48.
7. Marinovich, R., et al., *The role of bone sialoprotein in the tendon-bone insertion*. Matrix Biol, 2016. **52-54**: p. 325-338.
8. Lee, J.C., et al., *Optimizing Collagen Scaffolds for Bone Engineering: Effects of Cross-linking and Mineral Content on Structural Contraction and Osteogenesis*. J Craniofac Surg, 2015. **26**(6): p. 1992-6.
9. Dymant, N.A., et al., *Gdf5 progenitors give rise to fibrocartilage cells that mineralize via hedgehog signaling to form the zonal enthesis*. Developmental Biology, 2015. **405**(1): p. 96-107.
10. Font Tellado, S., E.R. Balmayor, and M. Van Griensven, *Strategies to engineer tendon/ligament-to-bone interface: Biomaterials, cells and growth factors*. Advanced Drug Delivery Reviews, 2015. **94**: p. 126-140.
11. Killian, M.L. and S. Thomopoulos, *Scleraxis is required for the development of a functional tendon enthesis*. The FASEB Journal, 2016. **30**(1): p. 301-311.
12. Friese, N., et al., *Regeneration of Damaged Tendon-Bone Junctions (Entheses)—TAK1 as a Potential Node Factor*. International Journal of Molecular Sciences, 2020. **21**(15): p. 5177.
13. Rothrauff, B.B., et al., *The Rotator Cuff Organ: Integrating Developmental Biology, Tissue Engineering, and Surgical Considerations to Treat Chronic Massive Rotator Cuff Tears*. Tissue Engineering Part B: Reviews, 2017. **23**(4): p. 318-335.
14. Felsenthal, N. and E. Zelzer, *Mechanical regulation of musculoskeletal system development*. Development, 2017. **144**(23): p. 4271-4283.
15. Shen, H., et al., *Connexin 43 Is Necessary for Murine Tendon Enthesis Formation and Response to Loading*. Journal of Bone and Mineral Research, 2020. **35**(8): p. 1494-1503.
16. Turlo, A.J., et al., *Insulin-like growth factor binding protein (IGFBP6) is a cross-species tendon marker*. Eur Cell Mater, 2019. **38**: p. 123-136.
17. Würgler-Hauri, C.C., et al., *Temporal expression of 8 growth factors in tendon-to-bone healing in a rat supraspinatus model*. Journal of Shoulder and Elbow Surgery, 2007. **16**(5, Supplement): p. S198-S203.
18. Derwin, K.A., et al., *Enthesis Repair*. Journal of Bone and Joint Surgery, 2018. **100**(16): p. e109.

19. Huang, L., et al., *Study of differential properties of fibrochondrocytes and hyaline chondrocytes in growing rabbits*. British Journal of Oral and Maxillofacial Surgery, 2015. **53**(2): p. 187-193.
20. Wang, I.N.E., et al., *Cellular interactions regulate stem cell differentiation in tri-culture*. Connective Tissue Research, 2016. **57**(6): p. 476-487.
21. Wu, C.-L., et al., *Single cell transcriptomic analysis of human pluripotent stem cell chondrogenesis*. Nature Communications, 2021. **12**(1).
22. Sun, H., et al., *Single-cell RNA-seq analysis identifies meniscus progenitors and reveals the progression of meniscus degeneration*. Annals of the rheumatic diseases, 2020. **79**(3): p. 408-417.
23. Han, X., et al., *Regulatory Mechanisms of the Ihh/PTHrP Signaling Pathway in Fibrochondrocytes in Entheses of Pig Achilles Tendon*. Stem cells international, 2016. **2016**: p. 8235172-8235172.
24. Galatz, L., et al., *Development of the supraspinatus tendon-to-bone insertion: Localized expression of extracellular matrix and growth factor genes*. Journal of Orthopaedic Research, 2007. **25**(12): p. 1621-1628.
25. Waggett, A.D., et al., *Characterization of collagens and proteoglycans at the insertion of the human Achilles tendon*. Matrix Biol, 1998. **16**(8): p. 457-70.
26. Kovacevic, D., et al., *rhPDGF-BB Promotes Early Healing in a Rat Rotator Cuff Repair Model*. Clinical Orthopaedics and Related Research®, 2015. **473**(5): p. 1644-1654.
27. Lei, T., et al., *Biomimetic strategies for tendon/ligament-to-bone interface regeneration*. Bioactive Materials, 2021. **6**(8): p. 2491-2510.
28. Pugliese, E., et al., *Development of three-layer collagen scaffolds to spatially direct tissue-specific cell differentiation for enthesis repair*. Mater Today Bio, 2023. **19**: p. 100584.
29. Kaji, D.A., et al., *Transcriptional profiling of mESC-derived tendon and fibrocartilage cell fate switch*. Nature communications, 2021. **12**(1): p. 4208-4208.
30. Long, F. and D.M. Ornitz, *Development of the endochondral skeleton*. Cold Spring Harb Perspect Biol, 2013. **5**(1): p. a008334.
31. Blitz, E., et al., *Tendon-bone attachment unit is formed modularly by a distinct pool of Scx- and Sox9-positive progenitors*. Development, 2013. **140**(13): p. 2680-90.
32. Craft, A.M., et al., *Specification of chondrocytes and cartilage tissues from embryonic stem cells*. Development, 2013. **140**(12): p. 2597-2610.
33. Chen, H., et al., *Recombinant human bone morphogenetic protein-4 enhances tendon-to-bone attachment healing in a murine model of rotator cuff tear*. Ann Transl Med, 2021. **9**(7): p. 565.
34. Menon, R.S., N.M. Wragg, and S.L. Wilson, *Rotator Cuff Repair Augmentation Using Osteoinductive Growth Factors*. SN Comprehensive Clinical Medicine, 2019. **1**(4): p. 267-276.
35. Kabuto, Y., et al., *Stimulation of Rotator Cuff Repair by Sustained Release of Bone Morphogenetic Protein-7 Using a Gelatin Hydrogel Sheet*. Tissue Eng Part A, 2015. **21**(13-14): p. 2025-33.
36. Gulotta, L.V. and S.A. Rodeo, *Growth factors for rotator cuff repair*. Clin Sports Med, 2009. **28**(1): p. 13-23.

37. Wischhusen, J., I. Melero, and W.H. Fridman, *Growth/Differentiation Factor-15 (GDF-15): From Biomarker to Novel Targetable Immune Checkpoint*. *Front Immunol*, 2020. **11**: p. 951.
38. Miescher, I., et al., *In Vitro and In Vivo Effects of IGF-1 Delivery Strategies on Tendon Healing: A Review*. *Int J Mol Sci*, 2023. **24**(3).
39. Kawai, M. and C.J. Rosen, *The insulin-like growth factor system in bone: basic and clinical implications*. *Endocrinol Metab Clin North Am*, 2012. **41**(2): p. 323-33, vi.
40. Narayanan, G., L.S. Nair, and C.T. Laurencin, *Regenerative Engineering of the Rotator Cuff of the Shoulder*. *ACS Biomater Sci Eng*, 2018. **4**(3): p. 751-786.
41. Prabhath, A., et al., *Pegylated insulin-like growth factor-1 biotherapeutic delivery promotes rotator cuff regeneration in a rat model*. *J Biomed Mater Res A*, 2022. **110**(7): p. 1356-1371.
42. Gonçalves, A.I., et al., *Understanding the role of growth factors in modulating stem cell tenogenesis*. *PLoS One*, 2013. **8**(12): p. e83734.
43. Liu, Y., et al., *Intracellular VEGF regulates the balance between osteoblast and adipocyte differentiation*. *J Clin Invest*, 2012. **122**(9): p. 3101-13.
44. Arimura, H., et al., *TGF- $\beta$ 1 Improves Biomechanical Strength by Extracellular Matrix Accumulation Without Increasing the Number of Tenogenic Lineage Cells in a Rat Rotator Cuff Repair Model*. *The American Journal of Sports Medicine*, 2017. **45**(10): p. 2394-2404.
45. Loisel, A.E., et al., *Bone marrow-derived matrix metalloproteinase-9 is associated with fibrous adhesion formation after murine flexor tendon injury*. *PLoS One*, 2012. **7**(7): p. e40602.
46. Dewey, M.J., et al., *Inclusion of a 3D-printed Hyperelastic Bone mesh improves mechanical and osteogenic performance of a mineralized collagen scaffold*. *Acta Biomaterialia*, 2021. **121**: p. 224-236.
47. Dewey, M.J., et al., *Glycosaminoglycan content of a mineralized collagen scaffold promotes mesenchymal stem cell secretion of factors to modulate angiogenesis and monocyte differentiation*. *Materialia*, 2021. **18**: p. 101149.
48. da Conceição Braga, L., et al., *Identification of best housekeeping genes for the normalization of RT-qPCR in human cell lines*. *Acta Histochem*, 2022. **124**(1): p. 151821.
49. Viganò, M., et al., *Housekeeping Gene Stability in Human Mesenchymal Stem and Tendon Cells Exposed to Tenogenic Factors*. *Tissue Eng Part C Methods*, 2018. **24**(6): p. 360-367.
50. Franko, N., et al., *TBP, PPIA, YWHAZ and EF1A1 Are the Most Stably Expressed Genes during Osteogenic Differentiation*. *Int J Mol Sci*, 2022. **23**(8).
51. Taihi, I., et al., *Validation of Housekeeping Genes to Study Human Gingival Stem Cells and Their In Vitro Osteogenic Differentiation Using Real-Time RT-qPCR*. *Stem Cells Int*, 2016. **2016**: p. 6261490.
52. Schildberg, T., et al., *Identification of suitable reference genes in bone marrow stromal cells from osteoarthritic donors*. *Stem Cell Res*, 2013. **11**(3): p. 1288-98.
53. Hurtado del Pozo, C., et al., *IPO8 and FBXL10: new reference genes for gene expression studies in human adipose tissue*. *Obesity (Silver Spring)*, 2010. **18**(5): p. 897-903.
